# Supplementary material for: Effects of Curcumin in a Mouse Model of Very High Fat Diet-Induced Obesity
Source: PubMed Central journal article supplement (PMC7650718; doi:10.3390/biom10101368), 2020-09-25

**Supplementary Materials:** The following are available online at [www.mdpi.com/xxx/s1](http://www.mdpi.com/xxx/s1)

**Table S1.** Primer sequences

| Gene             | Sequence                          |
|------------------|-----------------------------------|
| 18s              | F: 5'-GGACAGGATTGACAGATTGATAGC-3' |
|                  | R: 5'-TGCCAGAGTCTCGTTCGTTA-3'     |
| TBP              | F: 5'-GCCTTCCACCTTATGCTCAG-3'     |
|                  | R: 5'-GTGTGCTGCTGCTGTTG-3'        |
| Arg1             | F: 5'-CCTATCACCGCAGAACCT-3'       |
|                  | R: 5'-GCATCATACAACGAGCAGTG-3'     |
| CD38             | F: 5'-TTGCAAGGGTCTTGA AAC-3'      |
|                  | R: 5'-CGCTGCCTCATCTACTCA-3'       |
| CD80             | F: 5'-GTCGTCGTCATCGTTGCAT-3'      |
|                  | R: 5'-CCGAAGGTAAGGCTGTGTI-3'      |
| CD206            | F: 5'-CCTGTATGCCTGTGATTG-3'       |
|                  | R: 5'-GCTTGATATTCTTCTTGTGCGT-3'   |
| Col $\alpha$ (I) | F: 5'-CCTCAGGGTATTGCTGGACAAC-3'   |
|                  | R: 5'-ACCACTTGATCCAGAAGGACCTT-3'  |
| Col1 $\alpha$ 2  | F: 5'-CCCAGAGTGGAACAGCGATT-3'     |
|                  | R: 5'-ATGAGTCTTCGCTGGGGTG-3'      |
| Col3 $\alpha$ 1  | F: 5'-CTGGCCCTCCTGGTGCTTCT-3'     |
|                  | R: 5'-CCTTGGCCCATCCTTCCTG-3'      |
| Col4 $\alpha$ 1  | F: 5'-CCTCTTCTCCCTCCCATTTGT-3'    |
|                  | R: 5'-AGCGGGGTGTGTTAGTTACG-3'     |
| Col5 $\alpha$ 1  | F: 5'-AGATTACGAAGTTCCTCAGCGCA-3'  |
|                  | R: 5'-ATCATCCAGATTCCGGGAGCCAAA-3' |
| Col6 $\alpha$ 3  | F: 5'-GAGCATCCAGTTCAACCATCAA-3'   |
|                  | R: 5'-CCTCCACAACCTCCATACCA-3'     |
| Col8 $\alpha$ 1  | F: 5'-TCTGCCACCTCAAATCCCTCCTCA-3' |
|                  | R: 5'-TCTCCGCGCAAACCTGGCTAACG-3'  |
| CTGF             | F: 5'-ACTGCCCTTCCCGAGAA-3'        |
|                  | R: 5'-TCCTGGGCTCGTCACACA-3'       |
| FASN             | F: 5'-TGTATCCTGTGTCCAACCT-3'      |
|                  | R: 5'-GGCTTGTCTGCTCTAACTG-3'      |
| Fn1              | F: 5'-AGAACCAGAGGAGGCACAAG-3'     |
|                  | R: 5'-CCGTGTAAGGGTCAAAGCAT-3'     |
| Gln3             | F: 5'-GGATATCAAGTTGGAGT-3'        |

|               |                                        |
|---------------|----------------------------------------|
|               | R: 5'-GAGTTACAAGGTGAGATAA-3'           |
| GltD8         | F: 5'-ACATTGGTTATCTTGACTA-3'           |
|               | R: 5'-AGTTCTGCTGTATAATCC-3'            |
| ICAM-1        | F: 5'-CCGCTGTGCTTTGAGAACT-3'           |
|               | R: 5'-GGTCCTTGCCTACTTGCTG-3'           |
| IL-1 $\beta$  | F: 5'-GTCACAAGAAACCATGGCACAT-3'        |
|               | R: 5'-GCCCATCAGAGGCAAGGA-3'            |
| IL-10         | F: 5'-GGTTGCCAAGCCTTATCG-3'            |
|               | R: 5'-TCCACTGCCTTGCTCTTAT-3'           |
| MCP-1         | F: 5'-ACTTCTATGCCTCCTGCTCAT-3'         |
|               | R: 5'-CCTGCTTGATTCTCCTGTAG-3'          |
| MMP2          | F: 5'-GATACCCTCAAGAAGATGCAGAAGTT-3'    |
|               | R: 5'-ACATCTGGCTTCCGCATG-3'            |
| MMP9          | F: 5'-GAAGGCAAACCCTGTGTGTT-3'          |
|               | R: 5'-AGAGTACTGCTTGCCAGGA-3'           |
| MMP13         | F: 5'-ACTTAACTTACAGGATTGTGAATACTCCT-3' |
|               | R: 5'-TGTGTCAGCAGTGCCATCATAGATT-3'     |
| NF-kB p65     | F: 5'-GAAGCACAGATACCACCAAGAC-3'        |
|               | R: 5'-TCAGCCTCATAGTAGCCATCC-3'         |
| Pla2g         | F: 5'-GCTCCTGAACCTGAACAAGATG-3'        |
|               | R: 5'-TGCCACCAAGTCCACAGT-3'            |
| Ptgs2         | F: 5'-GCATTCATTCCTCTACAT-3'            |
|               | R: 5'-CAACTCACATATTCATAC-3'            |
| STAT1         | F: 5'-GACTTCAGACACAGAAATCAACTC-3'      |
|               | R: 5'-TTGACAAAGACCACGCCTT-3'           |
| TGF $\beta$ 1 | F: 5'-GCCCCGAAGCGGACTACTATG-3'         |
|               | R: 5'-AGATGGCGTTGTTGCGGT-3'            |
| TLR4          | F: 5'-AGTAGCACTGACACCTTCCTT-3'         |
|               | R: 5'-GCCTTAGCCTCTTCTCCTTCA-3'         |
| TIMP1         | F: 5'-CATGGAAGCCTCTGTGGATATG-3'        |
|               | R: 5'-GATGTGCAAATTTCCGTTTCTT-3'        |

**Figure S1.** Effect of curcumin on glucose metabolism. Before each test, the animals were fasted for 5 hours. Blood glucose levels were measured at 15, 30, 60, 90, and 120 min after administration of glucose or insulin. A) GTT: blood glucose levels time course. Test was conducted on week 11 of feeding with diets. Mice were challenged with 2 g/kg body weight glucose. B) GTT: area under the curve. C) ITT: blood glucose levels time course. Test was conducted on week 13 of feeding with diets. Mice were challenged with 0.75 U/kg body weight human insulin. D) ITT: area under the curve. Quantification of metabolic responses during the tests was performed by comparing the area under the curve. Data represented as mean with standard error of the mean; n = 7-10.

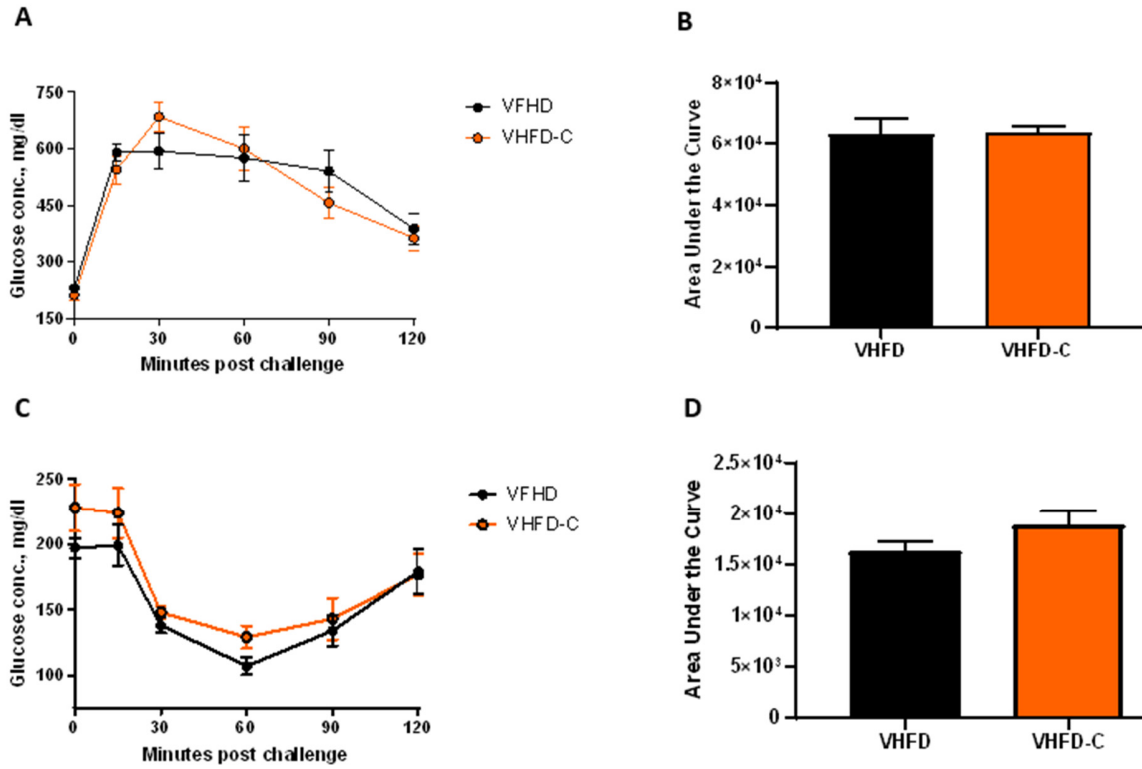

Figure S2. Curcumin effects on serum triglycerides (TG). Data of colorimetric assay. N = 10.

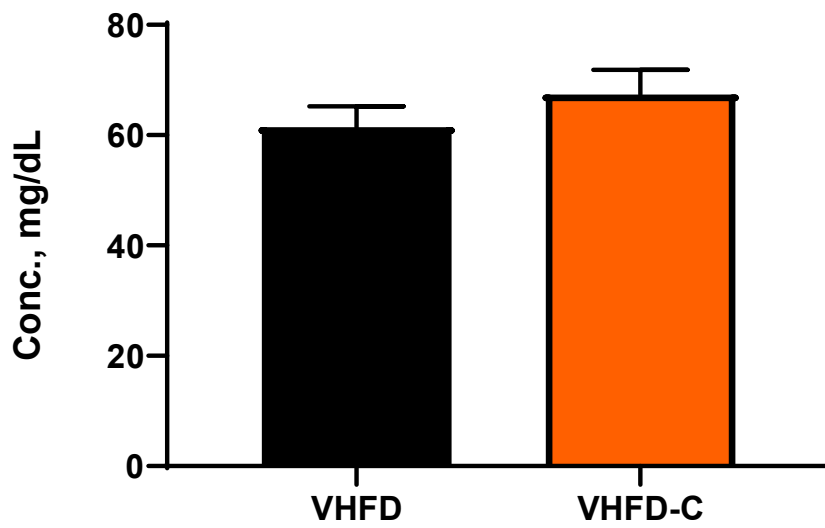

Figure S3. Effects of curcumin on gene expression in liver of curcumin-fed animals compared to control group. Target gene expression is normalized to TATA box binding protein gene. N = 5-6.

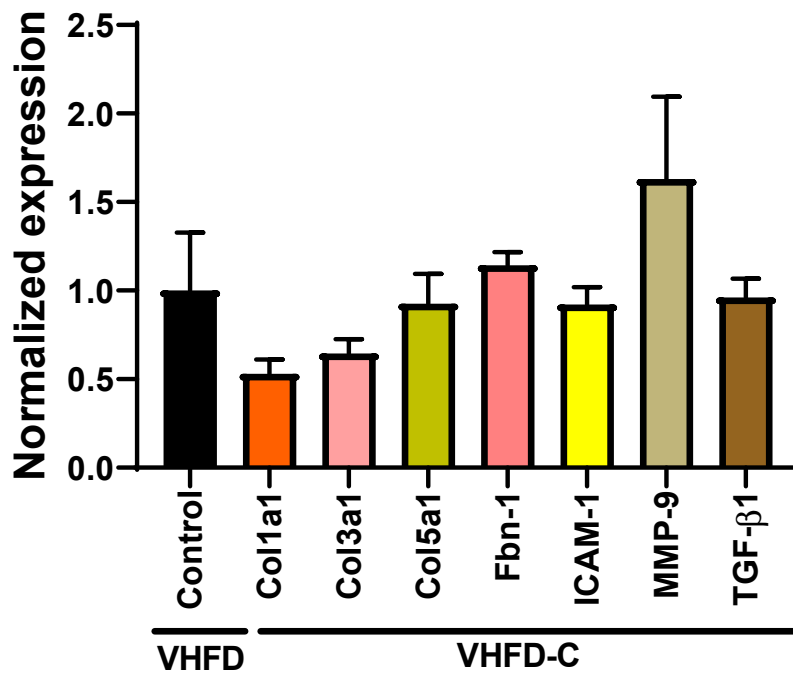

**Figure S4.** Effects of curcumin on gene expression in knee cartilage of curcumin-fed animals compared to control group. Target gene expression is normalized to TATA box binding protein gene. N = 6-7.

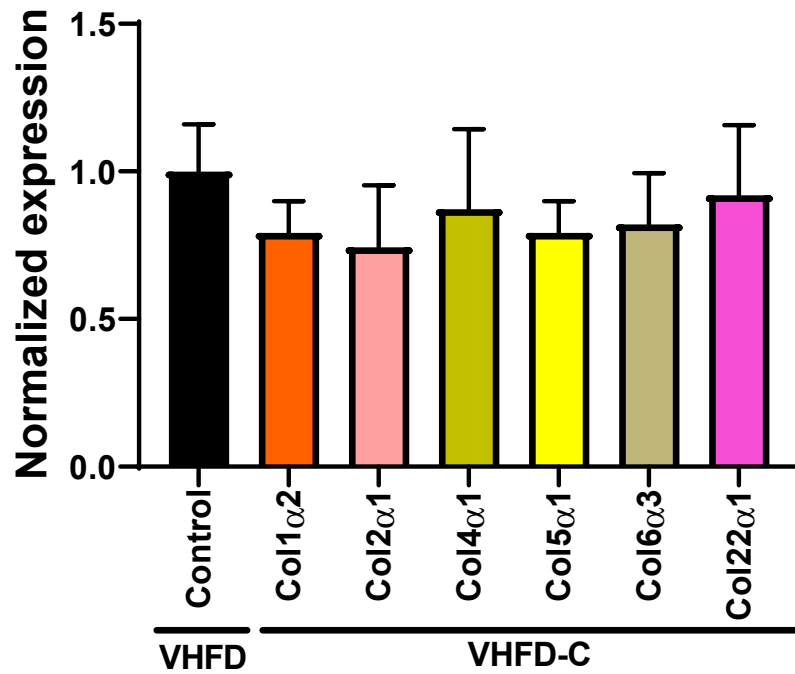

Supplement: biomolecules-10-01368-s001.pdf [file biomolecules-10-01368-s001.pdf]
